# Supplementary material for: Clinical Identification of Hypovitaminosis D among Elderly Attending Primary Care Centre in Saudi Arabia
Source: Hindawi journal article supplement (doi:10.1155/2022/6341645), 2022-10-12
Supplement: f1 [file 6341645.f1.pdf]

Name: .....

MRN: .....

Contact Nr.: .....

|                          |                                                                                                                                                                                                                                                                                                      |
|--------------------------|------------------------------------------------------------------------------------------------------------------------------------------------------------------------------------------------------------------------------------------------------------------------------------------------------|
| <b>Age</b>               | How old are you (in years)?  __  __  __                                                                                                                                                                                                                                                              |
| <b>Gender</b>            | Are you...? <input type="checkbox"/> Female or <input type="checkbox"/> Male                                                                                                                                                                                                                         |
| <b>General condition</b> | Do you think you have a lot of diseases? <input type="checkbox"/> Yes <input type="checkbox"/> No<br>Number of different drugs daily taken?  __  __ <br>Do you live alone? <input type="checkbox"/> Yes <input type="checkbox"/> No                                                                  |
| <b>Nutrition</b>         | What is your weight (in kg)?  __  __  __ ,  __ <br>What is your height (in meters)?  __ ,  __  __ <br>Do you feel malnourished? <input type="checkbox"/> Yes <input type="checkbox"/> No                                                                                                             |
| <b>Vision</b>            | Do you wear glasses? <input type="checkbox"/> Yes <input type="checkbox"/> No                                                                                                                                                                                                                        |
| <b>Mood</b>              | Do you regularly take psychoactive drugs? <input type="checkbox"/> Yes <input type="checkbox"/> No<br>Do you feel sad? <input type="checkbox"/> Yes <input type="checkbox"/> No                                                                                                                      |
| <b>Cognition</b>         | Do you have memory lapses? <input type="checkbox"/> Yes <input type="checkbox"/> No                                                                                                                                                                                                                  |
| <b>Gait and falls</b>    | Did you fall in the previous year (at least one fall)? <input type="checkbox"/> Yes <input type="checkbox"/> No<br>Do you usually use a walking aid? <input type="checkbox"/> Yes <input type="checkbox"/> No<br>Are you afraid of falling? <input type="checkbox"/> Yes <input type="checkbox"/> No |
| <b>Osteoporosis</b>      | Have you already had vertebral fractures? <input type="checkbox"/> Yes <input type="checkbox"/> No<br>Do you usually take osteoporotic medications? <input type="checkbox"/> Yes <input type="checkbox"/> No                                                                                         |

|                           |                                                                                                                                               |
|---------------------------|-----------------------------------------------------------------------------------------------------------------------------------------------|
| <b>Extra question (1)</b> | Do you currently take Vitamin D tablets/drops or supplements that contain Vitamin D? <input type="checkbox"/> Yes <input type="checkbox"/> No |
|---------------------------|-----------------------------------------------------------------------------------------------------------------------------------------------|

|                           |                                                                                                              |
|---------------------------|--------------------------------------------------------------------------------------------------------------|
| <b>Extra question (2)</b> | Questions are answered mainly by? <input type="checkbox"/> The patient <input type="checkbox"/> The relative |
|---------------------------|--------------------------------------------------------------------------------------------------------------|

Vitamin D level: ..... nmol/L.

Thank you 😊
